# Supplementary material for: Genome-wide identification and expression analysis of the AUX/IAA gene family in turnip (Brassica rapa ssp. rapa)
Source: BMC Plant Biol. 2023 Jun 27;23:342. doi: 10.1186/s12870-023-04356-y (PMC10294438; doi:10.1186/s12870-023-04356-y)
Supplement: Supplementary file 3 — Supplementary Material 3 [file 12870_2023_4356_MOESM3_ESM.pdf]

### Motif 1

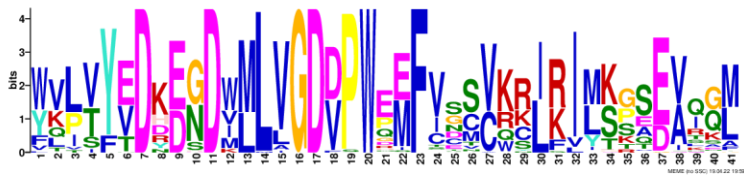

## Motif 2

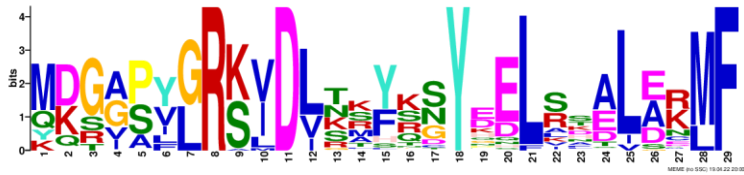

### Motif 3

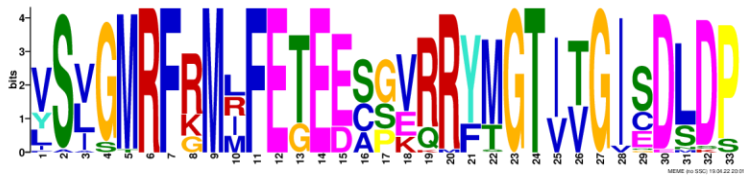

### Motif 4

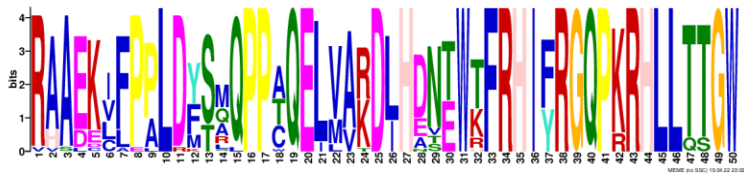

## Motif 5

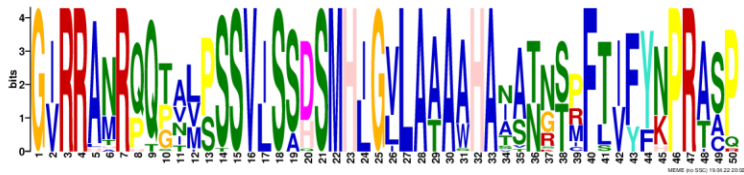

## Motif 6

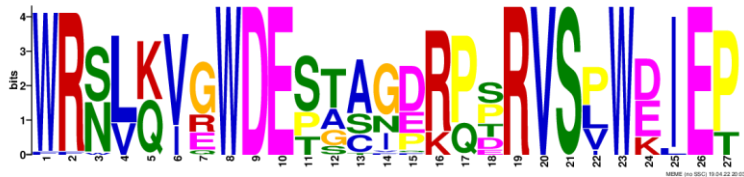

## Motif 7

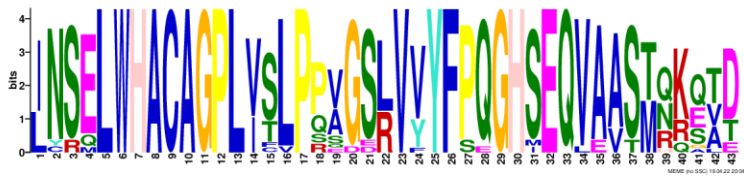

## Motif 8

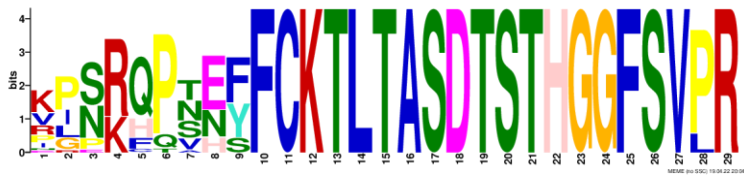

## Motif 9

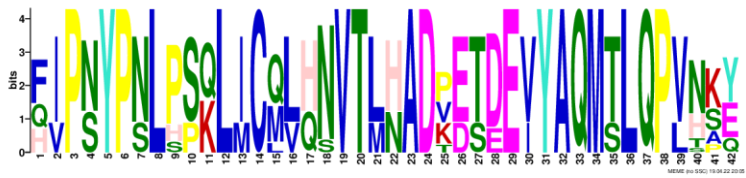

## Motif 10

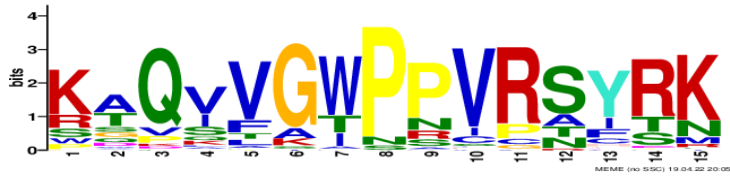

## Motif 11

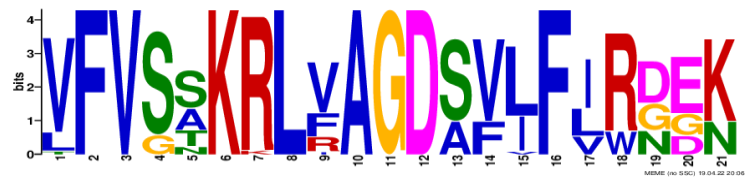

## Motif 12

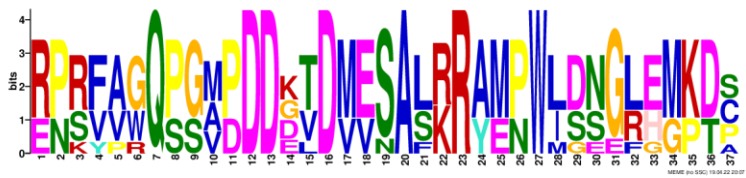

### Motif 13

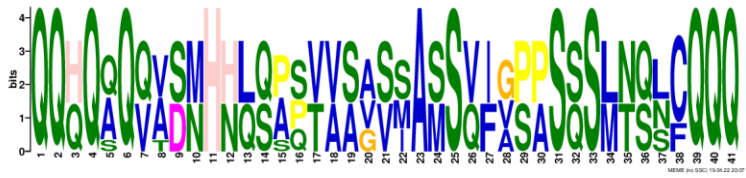

## Motif 14

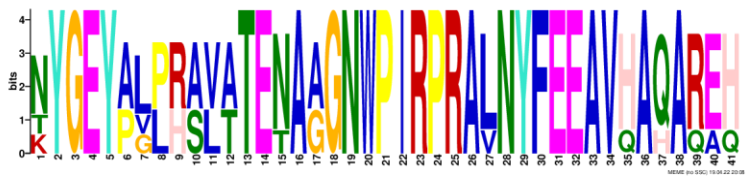

## Motif 15

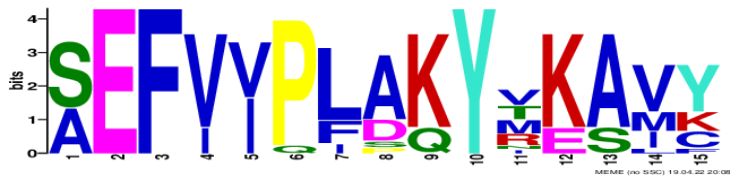

Addition file 3 The amino acid sequence of 15 conserved motifs
